# Supplementary material
Source: PubMed Central journal article supplement (PMC2760829)
Supplement: NIHMS114401-supplement-1.pdf [file NIHMS114401-supplement-1.pdf]

**AMPK $\alpha$ 2 deficiency exacerbates pressure-overload induced  
left ventricular hypertrophy and dysfunction in mice**

Ping Zhang<sup>1</sup>, Xinli Hu<sup>1,2</sup>, Xin Xu<sup>1,2</sup>, John Fasset<sup>1</sup>, Guangshuo Zhu<sup>1,2</sup>, Benoit Viollet<sup>3</sup>, Wayne Xu<sup>4</sup>, Brian Wiczer<sup>5</sup>, David A. Bernlohr<sup>5</sup>, Robert J. Bache<sup>1</sup>, Yingjie Chen<sup>1,2</sup>

Running Title: AMPK $\alpha$ 2 regulates pressure overload hypertrophy

<sup>1</sup> Cardiovascular Division and <sup>2</sup>Center for Vascular Biology, Department of Medicine, University of Minnesota, MN55455;

<sup>3</sup>Institut Cochin, Université René Descartes Paris 5, Institut National de la Santé et de la Recherche Medicale U567, Paris, France

<sup>4</sup>Supercomputing Institute, University of Minnesota

<sup>5</sup>Department of Biochemistry, Molecular Biology and Biophysics, University of Minnesota

Correspondence: Yingjie Chen, MD, PhD  
University of Minnesota  
Mayo Mail Code 508  
420 Delaware St. SE  
Minneapolis, MN55455  
Tel: (612) 624-8970  
Fax: (612) 626-4411  
email: [chenx106@umn.edu](mailto:chenx106@umn.edu)

*Myocardial AMPK activity:* Isoform-specific activities of AMPK were measured as previously described <sup>1</sup>. Left ventricular lysates were immunoprecipitated with specific antibodies against the AMPK $\alpha$ 1 or AMPK $\alpha$ 2 catalytic subunit and protein A/G beads (Santa Cruz Biotechnologies). Immunoprecipitates were washed in lysis buffer for 4 times and wash buffer (240 mmol/l HEPES and 480 mmol/l NaCl) for 2 times. Kinase reactions were performed in 40 mmol/l HEPES (pH 7.0), 0.2 mmol/l AMP, 80 mmol/l NaCl, 0.8 mmol/l DTT, 5 mmol/l MgCl<sub>2</sub>, 0.2 mmol/l ATP containing 2  $\mu$ Ci [32P]-ATP (MP Biomedicals), and 0.2 mmol/l synthetic SAMS peptide (Upstate) in a final volume of 40  $\mu$ l for 20 min at 30°C. At the end of the reaction, a 20- $\mu$ l aliquot was removed and spotted on Whatman P81 paper. The papers were washed six times in 1% phosphoric acid and one time with acetone. Radioactivity was quantitated with a scintillation counter. Activity was expressed as incorporated ATP (picomoles) per milligram of protein per minute.

*Neonatal rat cardiomyocyte (NVM) isolation and culture, cell area determination and protein synthesis.* NVM were isolated from 2-day-old Sprague-Dawley rats by enzymatic digestion<sup>2</sup> and separated from non-muscle cells on a discontinuous Percoll gradient according to a modified protocol from Dr. U. Mende<sup>2</sup> with minor modification as previously described<sup>3</sup>. Briefly, viable myocytes were plated in DMEM (2 X 10<sup>5</sup> cells/well of 24 well dish) containing 10% FCS, and incubated for 48-72 hrs to allow attachment and spreading. The medium was replaced with serum free media for 24 hours prior to treatment. For adenovirus transduction, cardiomyocytes were infected with 1, 10. or 25 plaque-forming units/cell of purified adenovirus expressing constitutively active AMPK1(CA AMPK) or GFP 24 hours before treatment with phenylephrine. To induce hypertrophy, cells were treated with 50 $\mu$ M phenylephrine (Sigma) for 48 hours. AMPK activators, AICAR (0.2mM ) (5-aminoimidazole-4-carboxy-amide-1-d-ribofuranoside)(Sigma), or Metformin (5mM)(sigma) was added 15 minutes prior to treatment with Phenylephrine. After 48 hours treatment, cells were fixed with

4% paraformaldehyde/PBS pH 7.4, permeabilized with 0.1% triton x-100 for 5 minutes, and immunostained for myosin heavy chain(MHC)(Abcam; Cambridge, MA), followed by detection with alexa fluor 555 conjugated anti-mouse (Invitrogen). In some experiments, ANP a hypertrophy marker, was also stained using rabbit anti-anf(Peninsula Biolabs;San Carlos, CA) and Rhodamine-phalloidin(5 units/ml in PBS Ph 7.4; Invitrogen) was used to stain actin. DAPI (300nM) (Invitrogen) was used to stain nuclei. Cell area was analyzed using Image J 1.34s (NIH, USA). At least 100 individual cells were measured per experiment. An additional set of cells were washed once with PBS, then collected for determining p-ACC<sup>Ser79</sup> and total ACC by Western blot. Cardiomyocyte protein synthesis was measured by [<sup>3</sup>H]-Leucine incorporation(2μCi/well during 48 hours treatment) as previously described<sup>3</sup>.

*Western Blots were performed as previously described<sup>4</sup>. Primary antibodies against ANP, total-Akt, p-Akt<sup>Ser473</sup>, p-S6<sup>Ser235/236</sup>, total p70S6K and p-p70S6K<sup>Thr389</sup>, total-elf4e, p-elf4e<sup>Ser209</sup>, and p-4EBP1<sup>Thr46</sup> p-AMPK<sup>Thr 172</sup> were purchased from Transduction Laboratories, Santa Cruz Inc, Sigma, Upstate or Cell Signaling Technology, respectively.*

## References

1. Hayashi T, Hirshman MF, Fujii N, Habinowski SA, Witters LA, Goodyear LJ. Metabolic stress and altered glucose transport: activation of AMP-activated protein kinase as a unifying coupling mechanism. *Diabetes*. 2000;49:527-531.
2. Zhang W, Anger T, Su J, Hao J, Xu X, Zhu M, Gach A, Cui L, Liao R, Mende U. Selective loss of fine tuning of Gq/11 signaling by RGS2 protein exacerbates cardiomyocyte hypertrophy. *The Journal of biological chemistry*. 2006;281:5811-5820.
3. Xu X Fassett ,JT, Hu XL, Zhu GS, Schnermann J, Bache RJ, and Chen Y. Endogenous adenosine protects the heart from severe systolic overload induced ventricular hypertrophy and congestive heart failure. *Hypertension*. 2008;51:1557-1564.
4. Zhang P, Xu X, Hu X, van Deel ED, Zhu G, Chen Y. Inducible nitric oxide synthase deficiency protects the heart from systolic overload-induced ventricular hypertrophy and congestive heart failure. *Circulation research*. 2007;100:1089-1098.

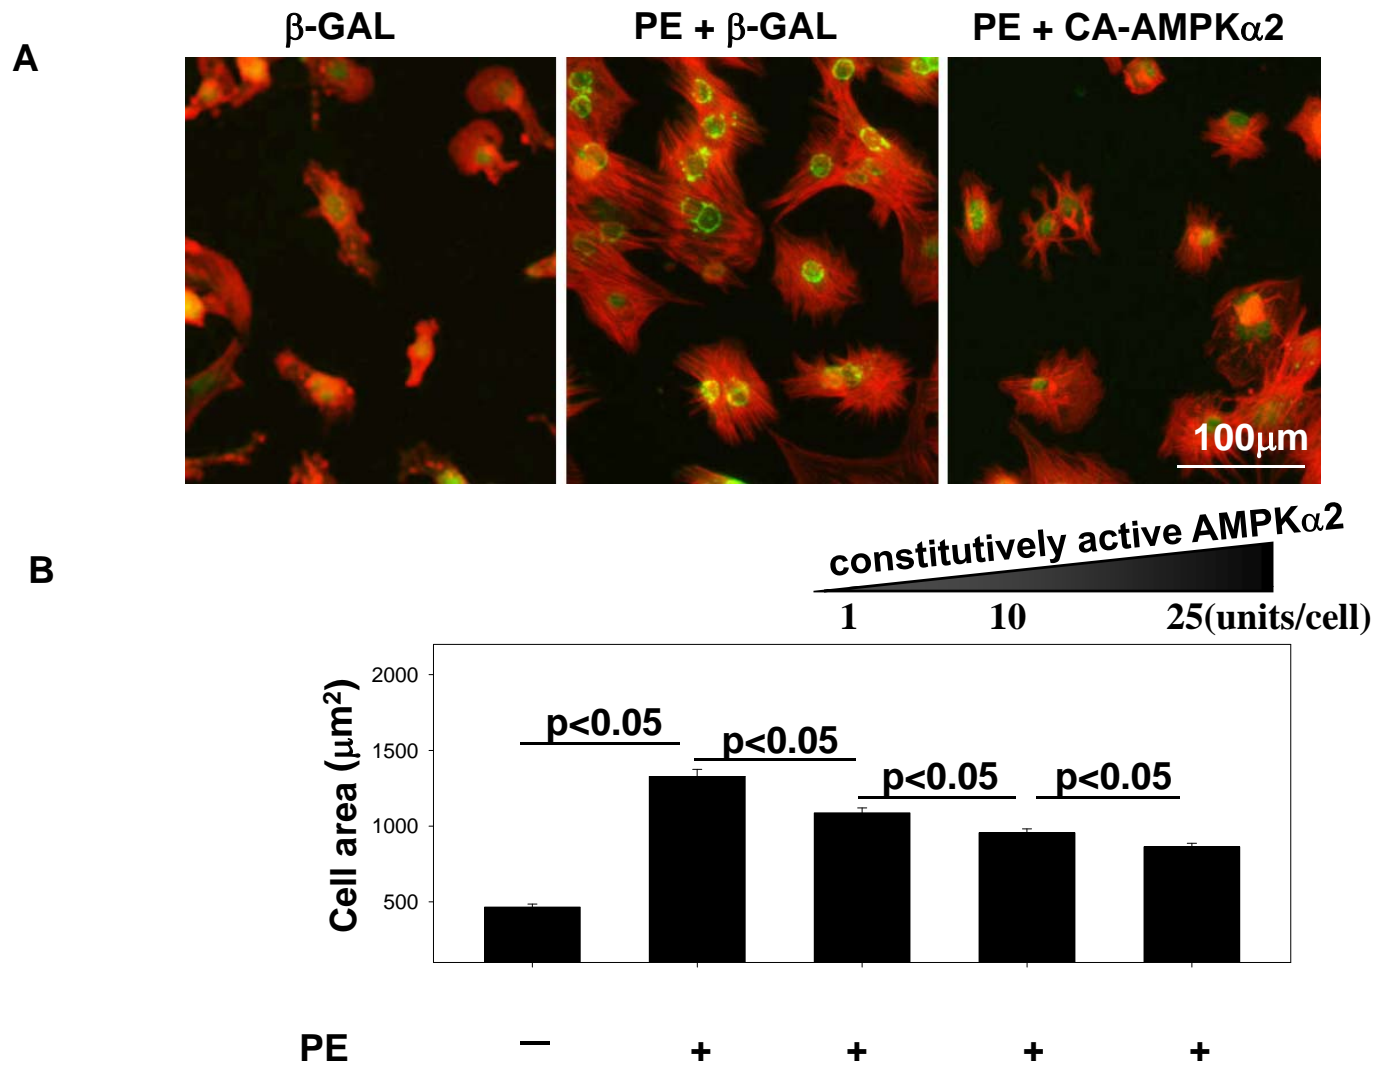

**Figure S1. Expression of constitutively active AMPK $\alpha$ 2(CA-AMPK) significantly attenuated phenylephrine (PE) induced hypertrophy in cultured rat cardiac myocytes. Red: phalloidin; green: ANP.**

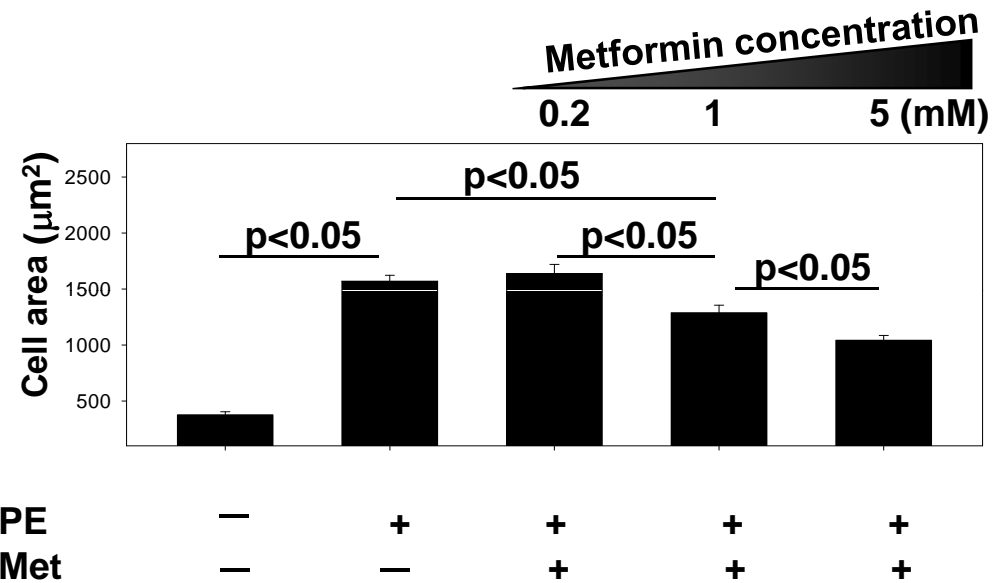

**Figure S2. Activation of AMPK by AMP activator metformin dose dependently attenuated phenylephrine (PE, 50  $\mu\text{M}$ ) induced hypertrophy in cultured rat cardiac myocytes.**

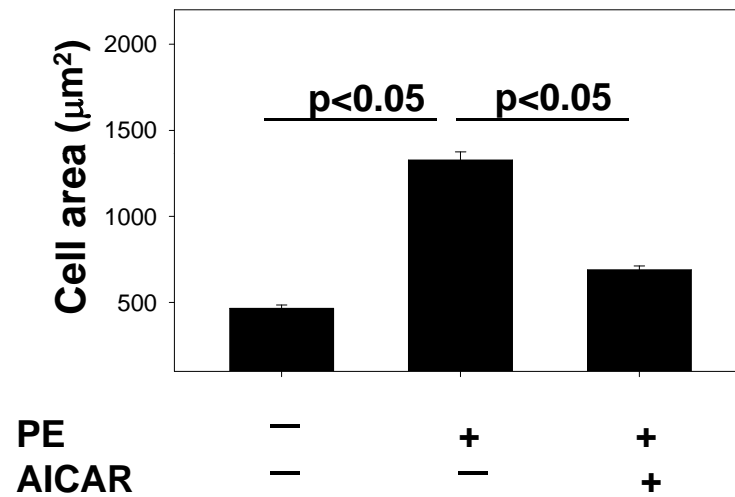

**Figure S3. Activation of AMPK by AMP analogue AICAR (0.2 mM) significantly attenuated phenylephrine (PE, 50 µM) induced hypertrophy in cultured rat cardiac myocytes (staining for α-myosin heavy chain).**

**A**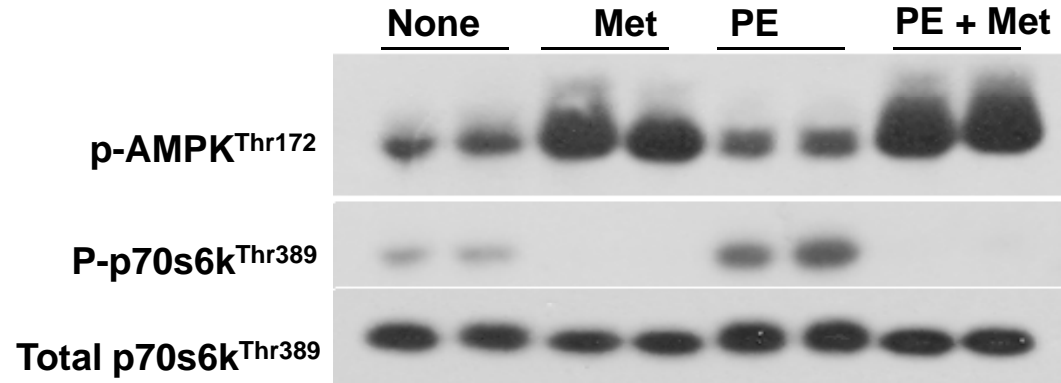**B**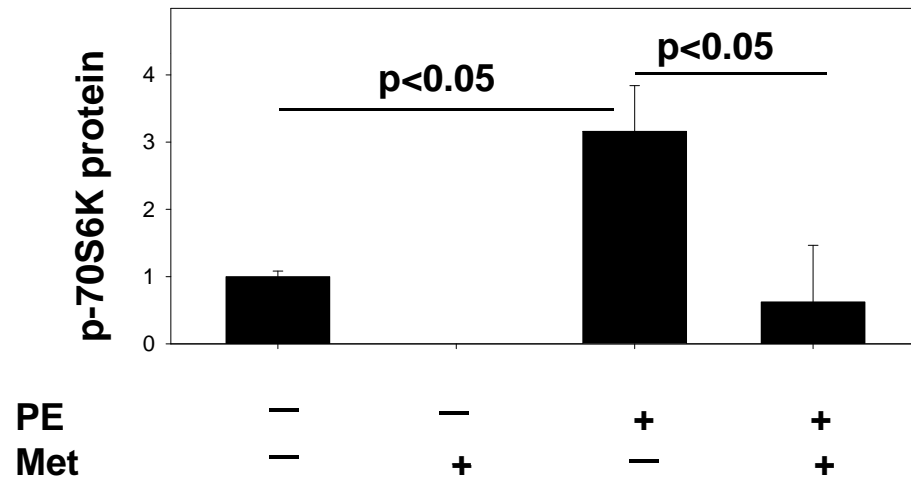

**Figure S4. Activation of AMPK by metformin (Met) (5 mM) significantly attenuated phenylephrine (PE, 50  $\mu$ M) induced increase of p-p70s6k.**



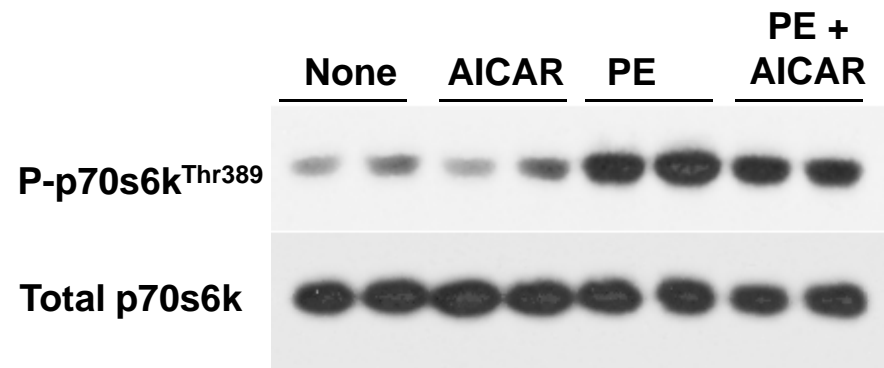

**Figure S5. Activation of AMPK by AICAR (0.2 mM) also attenuated phenylephrine (PE, 50  $\mu$ M) induced increase of p-p70s6k.**

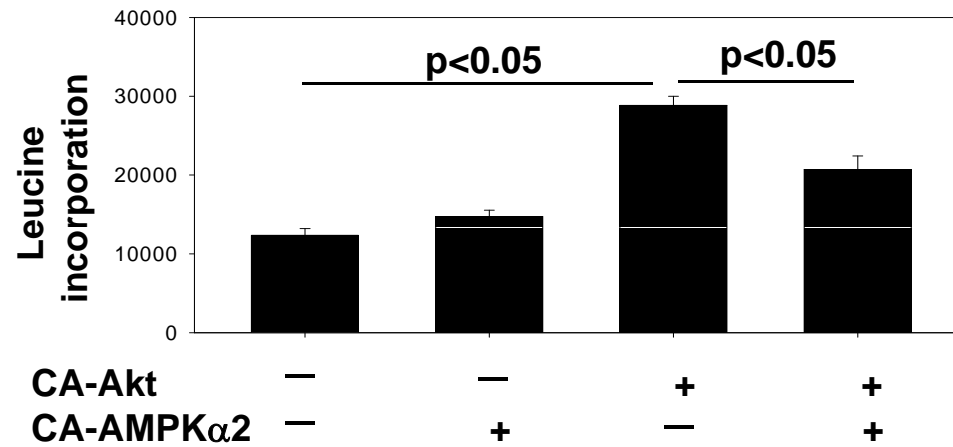

**Figure S6. Overexpression of constitutively activate AMPK $\alpha$ 2 (CA-AMPK, 5 pfus/cell) attenuated constitutively active Akt (CA-Akt, 5 pfus/cell) induced protein synthesis in cultured neonatal rat myocytes.**

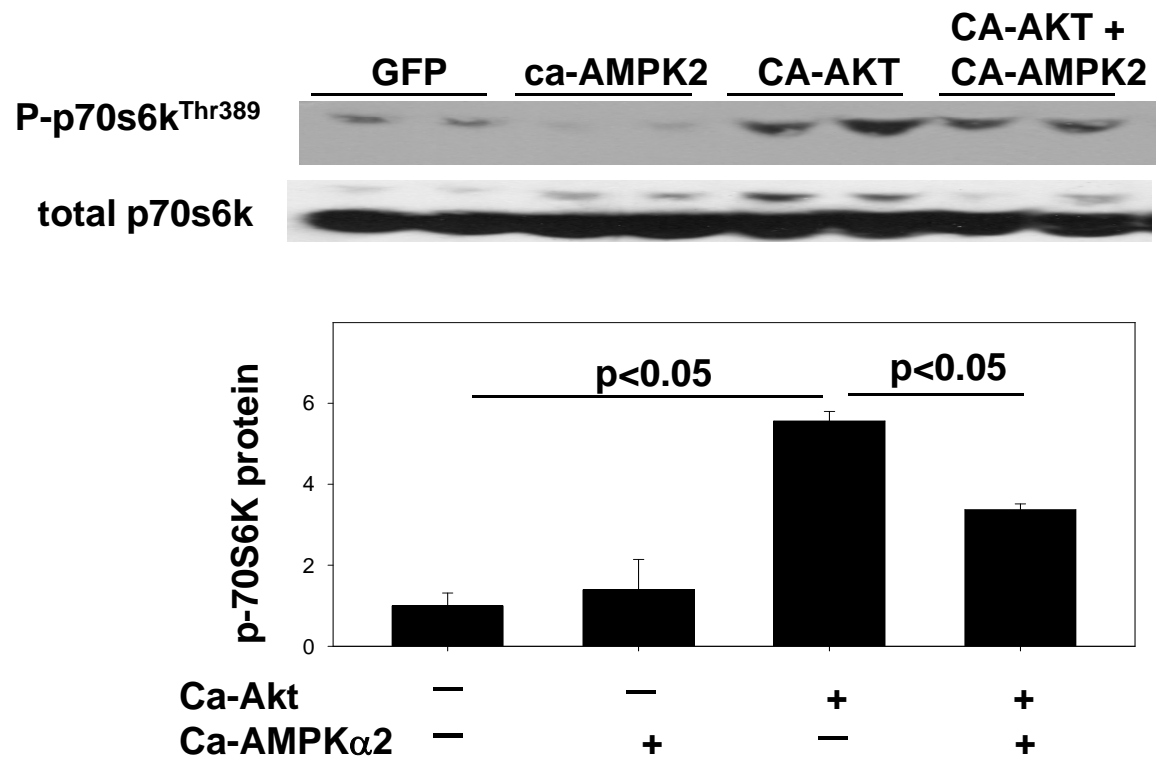

Figure S7. Overexpression of constitutive activated AMPK $\alpha$ 2 attenuated CA-Akt-induced increase of p-p70s6k<sup>Thr389</sup> in cultured neonatal rat myocytes.
